# Supplementary material for: Multi-stimulus responsive properties of a Cd-MOF based on tetraphenylethylene
Source: Royal Society of Chemistry journal article supplement (doi:10.1039/d3qi01954c), 2023-01-01
Supplement: d3qi01954c1.pdf [file d3qi01954c1.pdf]

## *Supporting Information*

### **Multi-stimulus responsive properties of Cd-MOF based on tetraphenylethylene**

*Chen Wang<sup>a</sup>, Ting Zhang<sup>a</sup>, Li-Xian Sun<sup>b</sup>, Yong-Heng Xing<sup>a\*</sup>, Feng-Ying Bai<sup>a\*</sup>*

<sup>a</sup> College of Chemistry and Chemical Engineering, Liaoning Normal University,  
Huanghe Road 850#, Dalian, 116029, P. R. China

<sup>b</sup> Guangxi Key Laboratory of Information Materials, Guilin University of Electronic  
Technology, Guilin 541004, P. R. China

E-mail: Yong-Heng Xing: [xingyongheng2000@163.com](mailto:xingyongheng2000@163.com); Feng-Ying Bai:  
[baifengying2003@163.com](mailto:baifengying2003@163.com)

# Table of Contents

|                                                                |           |
|----------------------------------------------------------------|-----------|
| <b>Materials and Instrumentation</b> .....                     | <b>3</b>  |
| <b>Reagent and Chemicals</b> .....                             | <b>3</b>  |
| <b>Synthesis method of Cd-tcbpe with “one pot”</b> .....       | <b>4</b>  |
| <b>X-ray crystallographic determination</b> .....              | <b>4</b>  |
| <b>Preparation route of Cd-tcbpe-B@PMMA film</b> .....         | <b>8</b>  |
| <b>Synthesis Discussion</b> .....                              | <b>8</b>  |
| <b>Structural description of Cd-tcbpe</b> .....                | <b>8</b>  |
| <b>DFT calculation</b> .....                                   | <b>12</b> |
| <b>Mechanochromic luminescence behavior of Cd-tcbpe</b> .....  | <b>13</b> |
| <b>Preparation of paper-based material of Cd-tcbpe-B</b> ..... | <b>16</b> |
| <b>Hydrochromic luminescence behavior of Cd-tcbpe</b> .....    | <b>18</b> |

## Materials and Instrumentation

The elemental analysis was carried out on a Perkin-Elmer 240C automatic analyzer. Infrared spectra were measured on a Bruker AXSTENSOR-27 FT-IR spectrometer with pressed KBr pellets in the range of 400-4000  $\text{cm}^{-1}$  at room temperature. UV-vis spectra were recorded on JASCOV-570 spectrometer (200-800 nm, in form of solid sample). X-ray powder diffraction (XRD) data were collected on a Bruker Advance-D8 with Cu  $K\alpha$  radiation, in the range  $5^\circ < 2\theta < 50^\circ$ , with a step size of  $0.02^\circ$  ( $2\theta$ ) and an acquisition time of 2 s per step. Thermogravimetric analysis (TG) was performed on a Perkin Elmer Diamond TG/DTA under the conditions of the  $\text{N}_2$  atmosphere in the temperature range from 30 to 800  $^\circ\text{C}$ . The photoluminescent spectra, photoluminescence quantum yield (PLQY), and fluorescence lifetime of the coordination polymers were measured on a HORIBA Fluoromax-4-TCSPC spectrofluorometer equipped with Spectra LED Pulsed LED sources at room temperature (200-1000 nm). In addition, PLQY was measured with the use of an integrating sphere. The inner surface of the integrating sphere shell is coated with barium sulfate-based materials or special materials of Spectralon, which have total reflection characteristics and can capture light entering and exiting the sphere. By measuring the spectra of the fluorescent substance and the blank cavity separately, the fluorescence emission ( $E_c$ ) and scattering ( $L_c$ ) of the fluorescent substance, as well as the emission ( $E_a$ ) and scattering ( $L_a$ ) of the blank cavity are measured. The fluorescence quantum yield is calculated according to the following formula.

$$\Phi_f = \frac{E_c - (1 - A) \cdot E_b}{L_a \cdot A} = \frac{E_c - E_a}{L_a - L_c}$$

$E_b$ : Fluorescence integration of fluorescent substances due to indirect luminescence from the integrating sphere; A: Absorption value of fluorescent substance at excitation wavelength.

## Reagent and Chemicals

Cadmium(II) nitrate [ $\text{Cd}(\text{NO}_3)_2 \cdot 4\text{H}_2\text{O}$ ] was purchased from Damao Chemical Reagent Factory. DMF (N,N'-dimethylformamide), zinc powder were purchased from Sinopharm Chemical Reagent Co., Ltd. Anhydrous ethanol was purchased from

Tianjin Fuyu Fine Chemical Co., Ltd. Cesium fluoride (CsF) was purchased from Shanghai Macklin Biochemical Co., Ltd. 4,4'-Dibromobenzophenone was purchased from Shanghai Haohong Biomedical Technology Co., Ltd. Methyl 4-boronobenzoate acid was purchased from Shanghai boka Chemical Technology Co., Ltd. 1,2-Dimethoxyethane and poly(methyl methacrylate) (PMMA) were purchased from Shanghai Aladdin Biochemical Technology Co., Ltd. Methanol (MeOH), tetrahydrofuran (THF), n-Hexane and dichloromethane (DCM) were purchased from Guangdong Guanghua Sci-Tech Co., Ltd. Hydrochloric acid, chloroform, and acetonitrile (CH<sub>3</sub>CN) were purchased from Tianjin Kemio Chemical Reagent Co., Ltd. Polydimethylsiloxane (PDMS) was purchased from Dongguan Yihui Adhesive Co., Ltd. All water used is deionized water. All chemical reagents were at least of analytical grade and were directly used without further purification. And the ligand H<sub>4</sub>tcbppe was synthesized with the reference to literature<sup>1</sup>. And the LEDs were purchased from Taobao network.

### **Synthesis method of Cd-tcbpe with “one pot”**

8.1 mg of H<sub>4</sub>tcbppe ligand and 30.8 mg of cadmium nitrate [Cd(NO<sub>3</sub>)<sub>2</sub>·4H<sub>2</sub>O] were dissolved in a mixture of 1 mL DMF and 0.5 mL ethanol, heated at 85°C for 12 h, and repeatedly washed with pure DMF solvent, and dried at room temperature to obtain pale yellow block crystals **Cd-tcbpe**. Yield: 28.6% (based on H<sub>4</sub>tcbppe).

### **X-ray crystallographic determination**

Single crystal X-ray reflection data was collected at room temperature on a Bruker AXS SMART APEX II CCD diffractometer with Mo-K $\alpha$  ( $\lambda = 0.71073 \text{ \AA}$ ) radiation. A semiempirical absorption correction was applied by the program SADABS. The program suite SHELXL-2018<sup>2, 3</sup> and OLEX 2<sup>4</sup> platform was used for space-group determination (XPREP), direct method structure solution (XS) and least-squares refinement (XL). Non-hydrogen atoms were refined with anisotropic displacement parameters in the final cycles. DELU commands were applied to Cd3 atom. Besides, the ‘OMIT’ command were used to remove the bad reflections in the structure; due to

the serious disorder of the solvent molecules, the 'SQUEEZE' command was used to deal with disorder of solvent DMF molecules in **Cd-tcbpe**. For **Cd-tcbpe**, we found four alert level B "D-H Bond Without Acceptor O5-H5A, O5-H5B, O7-H7A, O7-H7B" by checkcif in the structure. It can be attributed that O5-H5A, O5-H5B, O7-H7A, O7-H7B are part of water molecules or from water molecules that is likely disordered/on a partially occupied site and for the last one. And we also found one alert level B "Low 'MainMol' Ueq as Compared to Neighbors of Cd3" by checkcif in the structure of **Cd-tcbpe**. It could be attributed that the Cd3 atom may show some disorder. "Missing # of FCF Reflection(s) Below Theta(Min). 16 Note" was found in the checkcif of **Cd-tcbpe**. The reason might be that beamstop theta-min limit set too high, large unit-cell etc. The details of the crystal parameters, data collection, and refinement for **Cd-tcbpe** are summarized in Table S1, and selected bond lengths and angles with their estimated standard deviations are listed in Table S2. CCDC 2284476 contains crystallographic data for this work. These data can be obtained free of charge from the Cambridge Crystallographic Data Centre via [www.ccdc.cam.ac.uk/data\\_request/cif](http://www.ccdc.cam.ac.uk/data_request/cif).

**Table S1** Crystallographic data of **Cd-tcbpe\***

| Complex                                                      | Cd-tcbpe (SQUEEZE)                                               |
|--------------------------------------------------------------|------------------------------------------------------------------|
| Formula                                                      | C <sub>84</sub> H <sub>59</sub> Cd <sub>3</sub> NO <sub>15</sub> |
| Molecular weight                                             | 1659.52                                                          |
| Crystal system                                               | Orthorhombic                                                     |
| Space group                                                  | <i>Pbcn</i>                                                      |
| <i>a</i> /Å                                                  | 17.7252(4)                                                       |
| <i>b</i> /Å                                                  | 41.8784(10)                                                      |
| <i>c</i> /Å                                                  | 34.5610(8)                                                       |
| $\alpha$ (°)                                                 | 90                                                               |
| $\beta$ (°)                                                  | 90                                                               |
| $\gamma$ (°)                                                 | 90                                                               |
| V (Å <sup>3</sup> )                                          | 25654.7(10)                                                      |
| Z                                                            | 8                                                                |
| D <sub>calc</sub> /(g·cm <sup>-3</sup> )                     | 0.859                                                            |
| F(000)                                                       | 6672.0                                                           |
| $\mu$ / mm <sup>-1</sup>                                     | 0.532                                                            |
| 2 $\theta$ range/(°)                                         | 4.398-50.748                                                     |
| Reflections collected                                        | 166964                                                           |
| Independent reflections [ <i>I</i> >2 $\sigma$ ( <i>I</i> )] | 23522                                                            |
| Parameters                                                   | 789                                                              |
| Goodness of fit                                              | 1.022                                                            |
| R <sub>1</sub> <sup>a</sup>                                  | 0.0487(0.0678) <sup>b</sup>                                      |
| wR <sub>2</sub> <sup>a</sup>                                 | 0.1317 (0.1458) <sup>b</sup>                                     |
| $\Delta(\rho)$ (e Å <sup>-3</sup> )                          | 1.27 and -0.67                                                   |

\* a.  $R = \sum ||F_o| - |F_c|| / \sum |F_o|$ ,  $wR_2 = (\sum (w(F_o^2 - F_c^2)^2) / \sum (w(F_o^2)^2))^{1/2}$ ; b. [*F*<sub>o</sub>>4 $\sigma$ (*F*<sub>o</sub>)]; b. based on all data.

**Table S2** Selected bonds (Å) and angle (°) of **Cd-tcbpe**

| <b>Cd-tcbpe</b>                            |            |                                           |            |
|--------------------------------------------|------------|-------------------------------------------|------------|
| Selected bonds (Å)                         |            |                                           |            |
| Cd1-O3                                     | 2.2078(3)  | Cd1-O3 <sup>#3</sup>                      | 2.3078(3)  |
| Cd1-O1 <sup>#3</sup>                       | 2.2724(3)  | Cd1-O1                                    | 2.2724(3)  |
| Cd1-O2 <sup>#3</sup>                       | 2.5509(3)  | Cd1-O2                                    | 2.5509(3)  |
| Cd2-O12 <sup>#1</sup>                      | 2.2253(3)  | Cd2-O9 <sup>#6</sup>                      | 2.2320(3)  |
| Cd2-O4                                     | 2.522(3)   | Cd2-O5                                    | 2.3091(4)  |
| Cd2-O6                                     | 2.3541(3)  | Cd2-O2                                    | 2.3557(3)  |
| Cd3-O18                                    | 2.1933(3)  | Cd3-O13 <sup>#3</sup>                     | 2.2364(3)  |
| Cd3-O11 <sup>#10</sup>                     | 2.2740(3)  | Cd3-O7                                    | 2.2773(4)  |
| Cd3-O14 <sup>#9</sup>                      | 2.3218(3)  | Cd3-O6 <sup>#6</sup>                      | 2.3573(3)  |
| Cd4-O10 <sup>#12</sup>                     | 2.2272(3)  | Cd4-O10 <sup>#11</sup>                    | 2.2272(3)  |
| Cd4-O15                                    | 2.2556(3)  | Cd4-O15 <sup>#3</sup>                     | 2.2556(3)  |
| Cd4-O14                                    | 2.5996(3)  | Cd4-O14 <sup>#3</sup>                     | 2.5997(3)  |
| Selected angle (°)                         |            |                                           |            |
| O14-Cd4-O14 <sup>#3</sup>                  | 116.98(12) | O10 <sup>#12</sup> -Cd4-O14               | 120.28(11) |
| O10 <sup>#12</sup> -Cd4-O10 <sup>#11</sup> | 83.70(18)  | O15-Cd4-O14 <sup>#3</sup>                 | 85.05(12)  |
| O2 <sup>#3</sup> -Cd1-O2                   | 133.40(12) | O3-Cd1-O2 <sup>#3</sup>                   | 115.38(11) |
| O3-Cd1-O1                                  | 149.14(12) | O1-Cd1-O2                                 | 53.57(11)  |
| O14 <sup>#9</sup> -Cd3-O6 <sup>#6</sup>    | 83.62(11)  | O13 <sup>#13</sup> -Cd3-O14 <sup>#9</sup> | 176.12(11) |
| O13 <sup>#13</sup> -Cd3-O7                 | 89.24(15)  | O7-Cd3-O6 <sup>#6</sup>                   | 169.93(14) |
| O12 <sup>#1</sup> -Cd2-O4                  | 172.54(12) | O9 <sup>#6</sup> -Cd2-O6                  | 94.66(14)  |
| O5-Cd2-O2                                  | 86.92(17)  | O5-Cd2-O6                                 | 174.45(17) |
| C73-C72-C77                                | 120.0      | C14-C28-C29                               | 122.7(3)   |
| C56-N1-C57                                 | 117.7(5)   | C17-C18-C19                               | 120.0      |

**Cd-tcbpe:** #1: x-1/2, -y+3/2, -z+1; #2: -x+1/2, y+1/2, z; #3: -x+1, y, -z+3/2; #4: x-1/2, y+1/2, -z+3/2; #5: x, y-1, z; #6: -x+1, -y+1, -z+1; #7: x-1/2, -y+1/2, -z+1; #8: -x+3/2, y+1/2, z; #9: x+1/2, -y+3/2, -z+1; #10: x+1/2, -y+1/2, -z+1; #11: x, y+1, z; #12: -x+1, y+1, -z+3/2; #13: -x+3/2, y-1/2, z; #14: -x, y, -z+3/2

## Preparation route of Cd-tcbpe-B@PMMA film

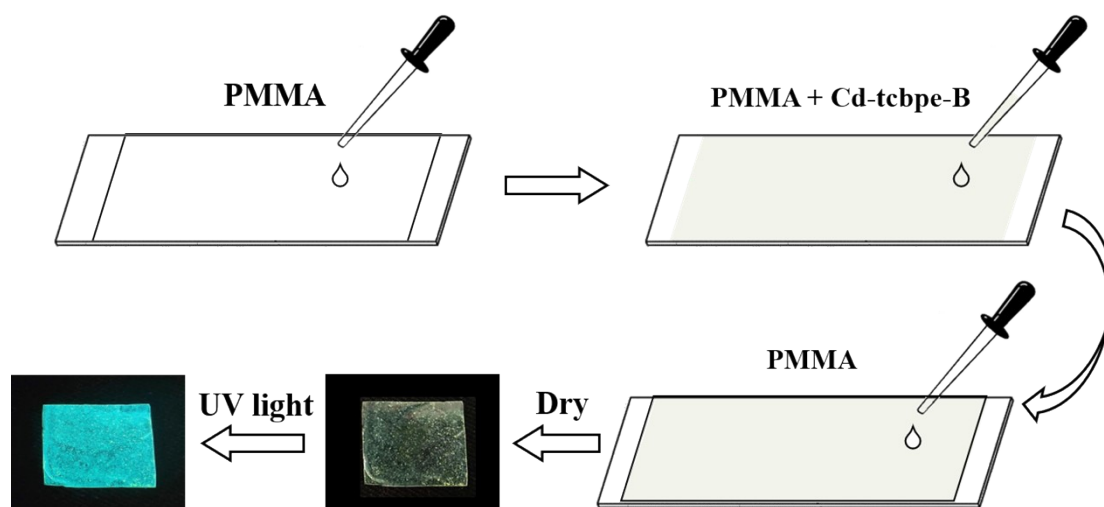

Scheme S1 Preparation route of Cd-tcbpe-B@PMMA film

## Synthesis Discussion

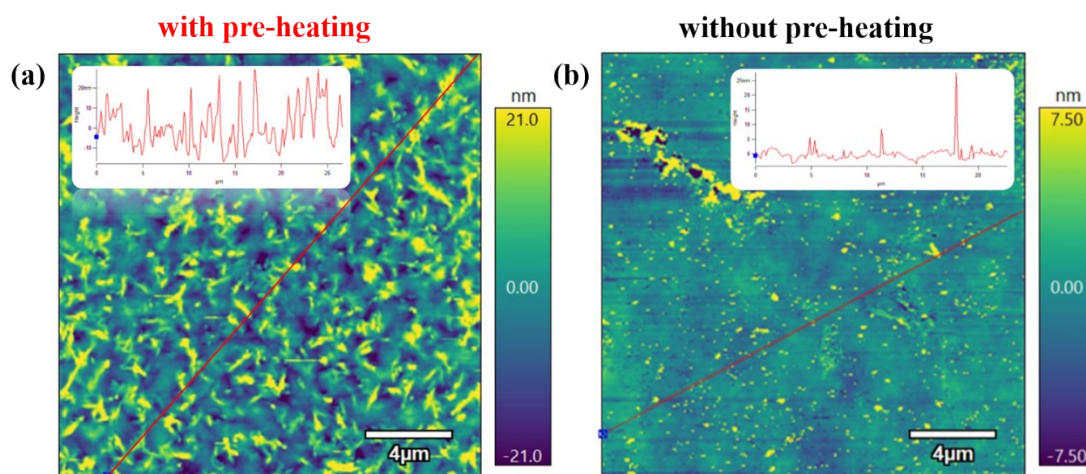

Figure S1 (a) AFM images of the preheating solution in “two step” method and (b) without preheating solution in “one pot” method

## Structural description of Cd-tcbpe

Single-crystal X-ray diffraction analysis demonstrated that **Cd-tcbpe** crystallizes in orthorhombic crystal system, *Pbcn* space group. In its asymmetric unit, there are four  $\text{Cd}^{2+}$  ions, one and a half of deprotonated tcbpe<sup>4-</sup> ligand, one coordinated DMF molecule and two coordinated water molecules. Among them, the crystallographic



occupancy of Cd1 and Cd4 is 0.5. Four metal Cd<sup>2+</sup> ions exhibit two different coordination environments: Cd1, Cd4 coordinate with six carboxyl oxygen atoms from four tcbpe<sup>4-</sup> ligands, forming a twisted octahedral configuration; And Cd2 and Cd3 compose another octahedral configuration with four carboxyl oxygen atoms from four ligands, one coordinated H<sub>2</sub>O molecule, and a coordinated DMF molecule, respectively (Figure S2a). Moreover, H<sub>4</sub>tcbpe ligand is completely deprotonation in coordination process, and form two different connection modes:  $\mu_8-\eta^1\eta^1\eta^1\eta^1\eta^1\eta^1\eta^1$  and  $\mu_8-\eta^1\eta^2\eta^1\eta^2\eta^1\eta^2$  (Figure S2b). These [CdO<sub>6</sub>] metal polyhedrons are linked to form an infinitely extending spiral chain structure along the b-axis direction by the carboxyl groups in H<sub>4</sub>tcbpe ligand, as shown in Figure S2d. Each of spiral chain structure is connected by ligands to form a three-dimensional network structure with large pore structure (Figure S2c). A 54.1 % solvent accessible volume calculated by OLEX 2. And simplify the tcbpe<sup>4-</sup> ligand as an 8-c node, metal Cd<sup>2+</sup> as a 4-c node, resulting in a 4-node (4<sup>2</sup>, 8<sup>2</sup>-c net), the point symbol for net is {4<sup>12</sup>.6<sup>14</sup>.8<sup>2</sup>}<sub>2</sub>{4<sup>4</sup>.6<sup>2</sup>}<sub>6</sub>{4<sup>8</sup>.6<sup>12</sup>.8<sup>8</sup>} (Figure S2e).

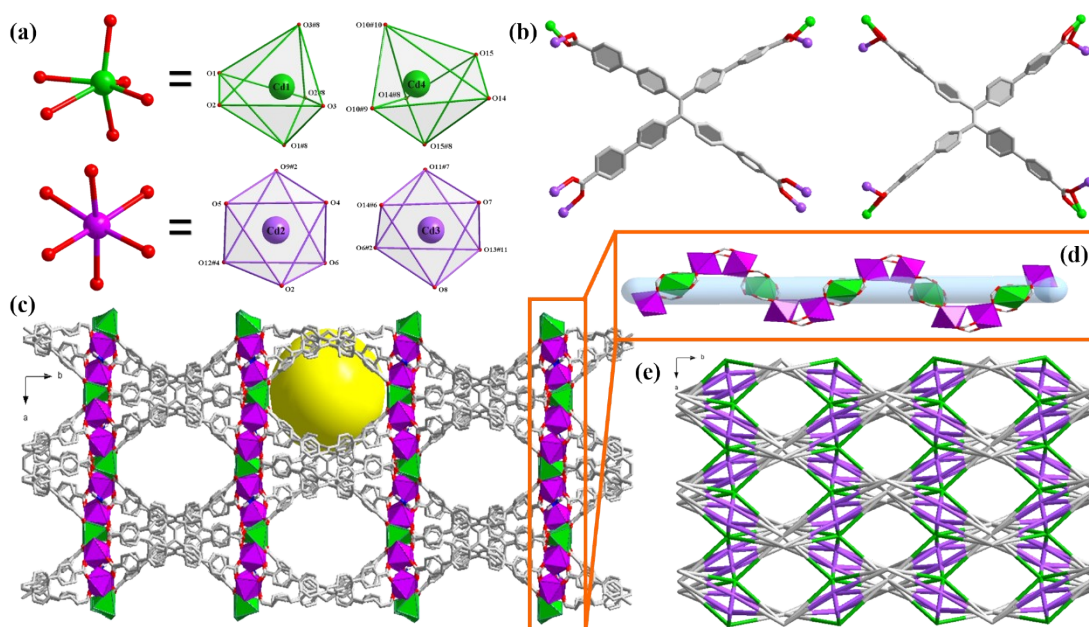

**Figure S2** (a) Coordination environment of four Cd<sup>2+</sup> ions; (b) Two different connected mode of H<sub>4</sub>tcbpe ligand; (c) Three-dimensional network of Cd-tcbpe; (d) 1D spiral chain structure; (e)

Simplified topological structure of Cd-tcbpe

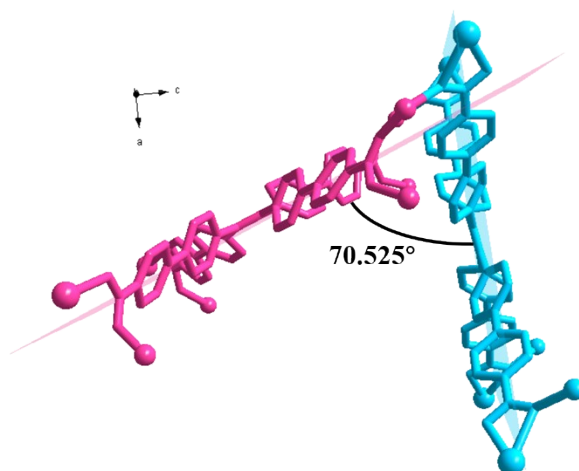

**Figure S3** Formation of spatial expression of ligand with two different coordination modes

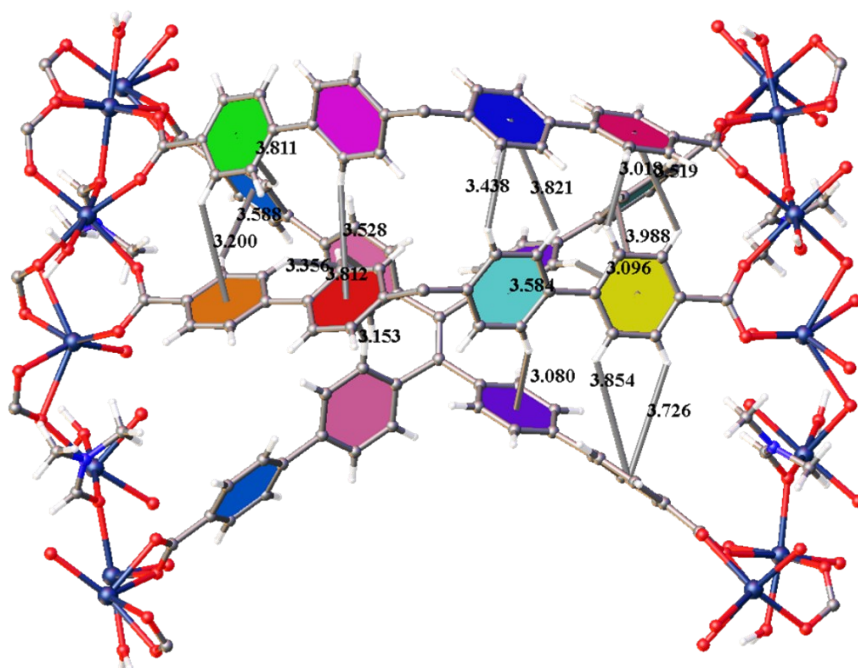

**Figure S4** C-H... $\pi$  intermolecular interaction in Cd-tcbpe structure

**Table S3** C-H... $\pi$  interaction in the structure of Cd-tcbpe

| X-H...Cg (Å)                | H...Cg (Å) | X...Cg (Å) | X-H...Cg (°) |
|-----------------------------|------------|------------|--------------|
| C20-H20...Cg1 <sup>#6</sup> | 3.439      | 3.717      | 142.60(3)    |
| C19-H19...Cg1 <sup>#6</sup> | 3.821      | 4.346      | 143.69 (4)   |
| C26-H26...Cg2 <sup>#6</sup> | 3.018      | 3.785      | 138.82(10)   |

|                              |       |       |            |
|------------------------------|-------|-------|------------|
| C25-H25···Cg2 <sup>#6</sup>  | 3.519 | 4.036 | 150.24(12) |
| C31-H31···Cg3 <sup>#6</sup>  | 3.528 | 4.324 | 146.52(4)  |
| C37-H37···Cg4 <sup>#6</sup>  | 3.200 | 3.925 | 124.56(6)  |
| C77-H77···Cg3 <sup>#4</sup>  | 3.153 | 3.868 | 35.31(4)   |
| C61-H61···Cg5 <sup>#2</sup>  | 3.988 | 4.633 | 37.37(3)   |
| C66-H66···Cg5 <sup>#2</sup>  | 3.096 | 3.967 | 28.25(13)  |
| C67-H67···Cg6 <sup>#2</sup>  | 3.584 | 4.383 | 152.12(5)  |
| C79-H79···Cg7 <sup>#1</sup>  | 3.811 | 4.586 | 123.20(3)  |
| C76-H76···Cg4 <sup>#4</sup>  | 3.401 | 4.161 | 4.16(5)    |
| C17-H17···Cg8 <sup>#a</sup>  | 3.080 | 3.916 | 35.87(3)   |
| C22-H22···Cg9 <sup>#a</sup>  | 3.854 | 4.500 | 5.5(2)     |
| C23-H23···Cg9 <sup>#a</sup>  | 3.726 | 4.435 | 59.89(8)   |
| C6-H6···Cg10 <sup>#b</sup>   | 3.356 | 4.087 | 152.70(4)  |
| C13-H13···Cg10 <sup>#b</sup> | 3.812 | 4.478 | 139.19(4)  |
| C7-H7···Cg11 <sup>#b</sup>   | 3.588 | 4.469 | 123.49(4)  |

---

Symmetry codes: #1:  $x-1/2, -y+3/2, -z+1$ ; #2:  $-x+1/2, y+1/2, z$ ; #4:  $x-1/2, y+1/2, -z+3/2$ ; #6:  $-x+1, -y+1, -z+1$ ; #a:  $x+1/2, -1/2+y, 3/2-z$ ; #b:  $1/2-x, y-1/2, z$ ; Cg1 is the centroid of C46, C45, C44, C43, C43, and C47; Cg2 is the centroid of C52, C51, C50, C49, C48, and C53; Cg3 is the centroid of C12, C11, C10, C9, C8, and C13; Cg4 is the centroid of C6, C5, C4, C3, C2, and C7; Cg5 is the centroid of C21, C22, C23, C24, C25, and C26; Cg6 is the centroid of C15, C16, C17, C18, C19, and C20; Cg7 is the centroid of C35, C36, C37, C38, C39, and C40; Cg8 is the centroid of C70, C69, C68, C67, C66, and C65; Cg9 is the centroid of C63, C62, C37, C61, C60, and C64; Cg10 is the centroid of C72, C73, C74, C75, C76, and C77; Cg11 is the centroid of C78, C79, C80, C81, C82, and C83.

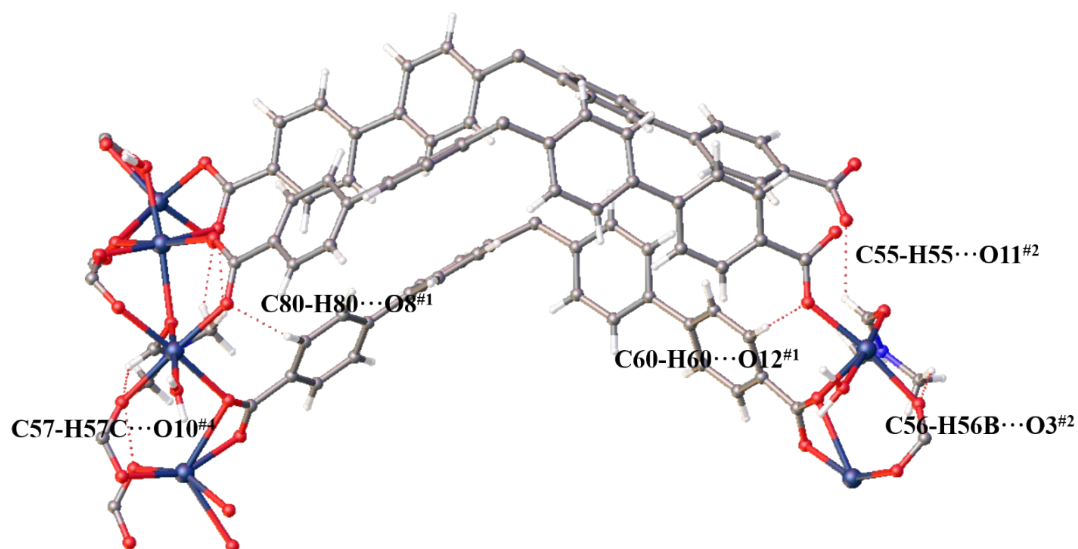

Figure S5 C-H $\cdots$ O hydrogen bond interactions in **Cd-tcbpe** structure

Table S4 Hydrogen bonding interaction in the structure of **Cd-tcbpe**

|                                     | D-H  | H $\cdots$ A | D $\cdots$ A | <(DHA) |
|-------------------------------------|------|--------------|--------------|--------|
| C80-H80 $\cdots$ O8 <sup>#1</sup>   | 0.93 | 2.42         | 3.283(4)     | 154.7  |
| C60-H60 $\cdots$ O12 <sup>#1</sup>  | 0.93 | 2.36         | 3.291(4)     | 177.5  |
| C55-H55 $\cdots$ O11 <sup>#2</sup>  | 0.93 | 2.35         | 2.950(6)     | 122.2  |
| C56-H56B $\cdots$ O3 <sup>#2</sup>  | 0.96 | 2.33         | 3.227(7)     | 154.5  |
| C57-H57C $\cdots$ O10 <sup>#4</sup> | 0.96 | 2.55         | 3.251(7)     | 130.3  |

#1:  $x-1/2, -y+3/2, -z+1$ ; #2:  $-x+1/2, y+1/2, z$ ; #4:  $x-1/2, y+1/2, -z+3/2$

### DFT calculation

In DFT calculation of **Cd-tcbpe**, the calculated model was constructed from the corresponding crystallographic structure, where the metals were deleted and hydrogen atoms were added to make it neutral. Then the added H atoms were optimized using DFT for Gaussian 09<sup>5</sup> at the level of B3LYP/6-31G\* with the other parts fixed at their reported crystallographic positions.

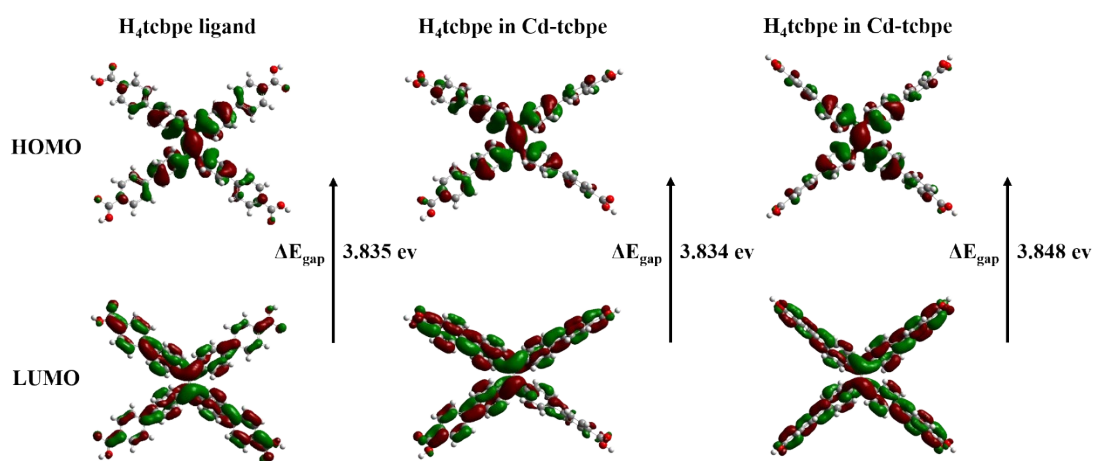

**Figure S6** HOMO and LUMO energy level<sup>5</sup> of  $H_4tcbpe$  in free conformation<sup>1</sup> and Cd-tcbpe conformation

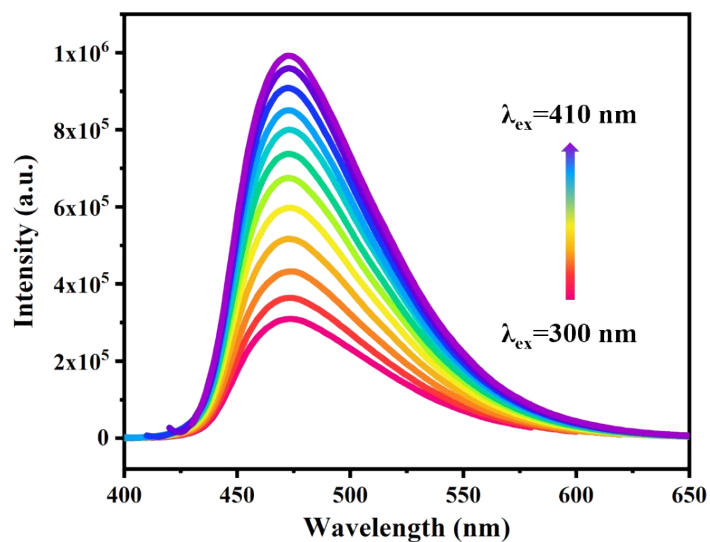

**Figure S7** Fluorescence emission spectra of Cd-tcbpe at different excitation wavelength from 300 nm to 410 nm (1 nm: 1 nm)

### Mechanochromic luminescence behavior of Cd-tcbpe

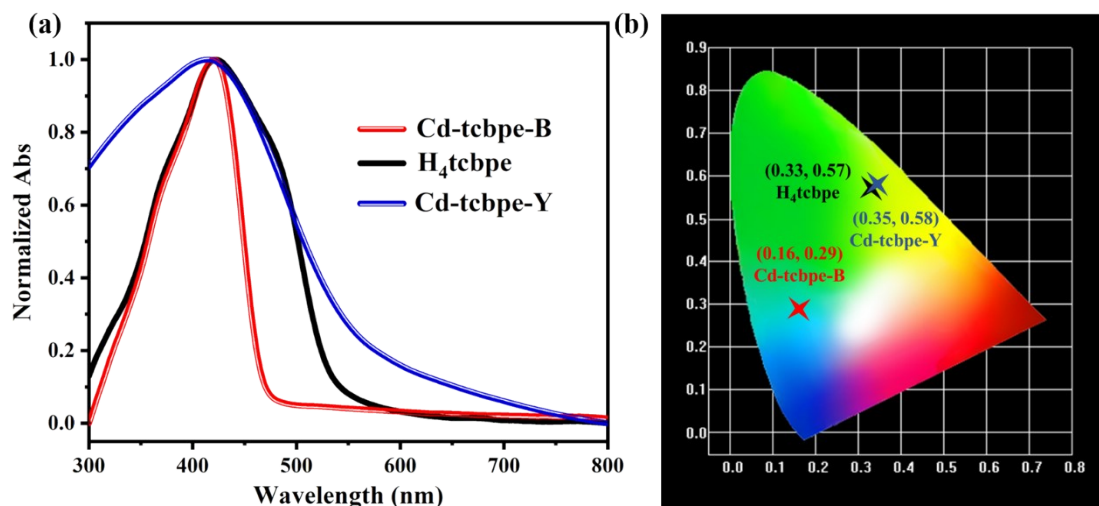

**Figure S8** (a) UV-vis spectra of Cd-tcbpe-B, Cd-tcbpe-Y and H<sub>4</sub>tcbpe; (b) CIE coordinates of Cd-tcbpe-B, Cd-tcbpe-Y and H<sub>4</sub>tcbpe

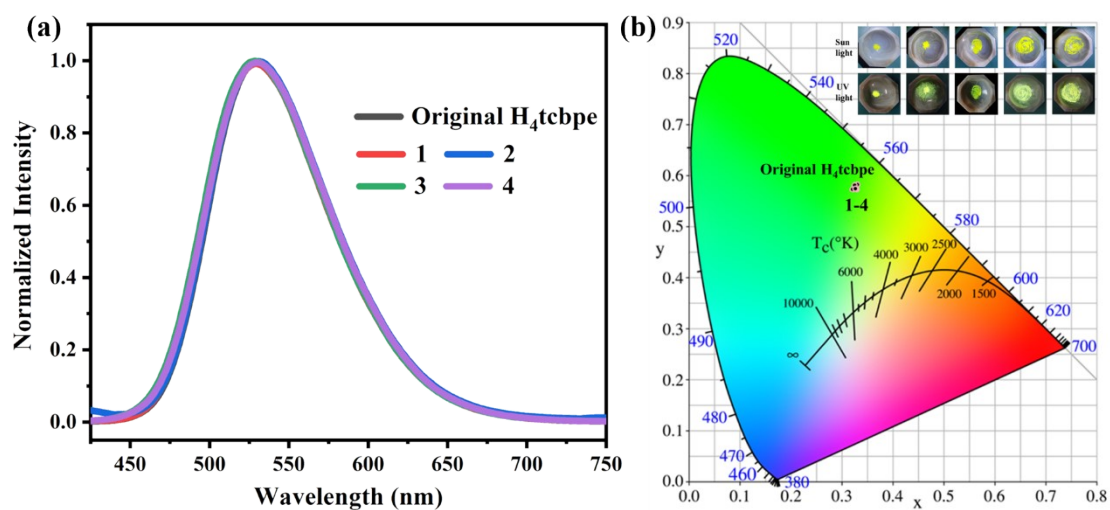

**Figure S9** (a) Fluorescence emission spectra of H<sub>4</sub>tcbpe with the process of grinding; (b) Changes of CIE coordinates with the process of grinding

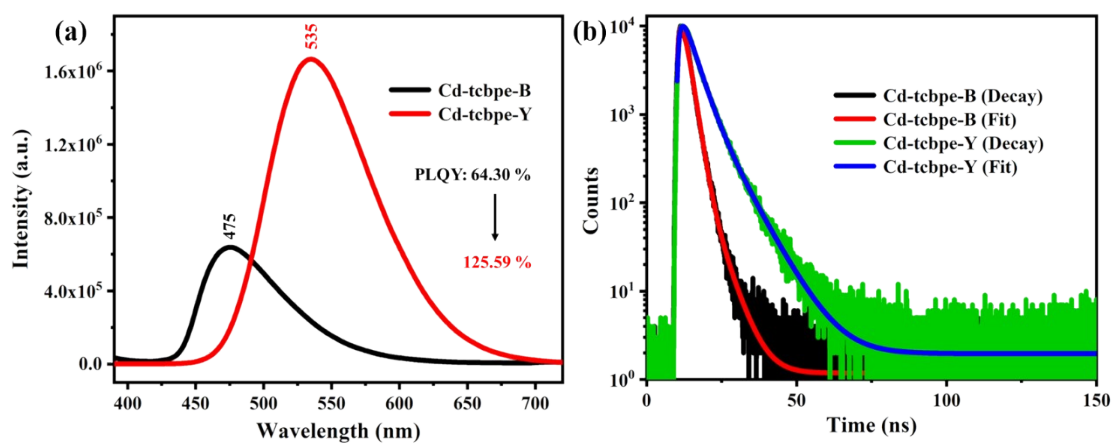

Figure S10 (a) Change of fluorescence emission spectra of Cd-tcbpe-B and Cd-tcbpe-Y; (b)

Fluorescence lifetimes of Cd-tcbpe-B and Cd-tcbpe-Y

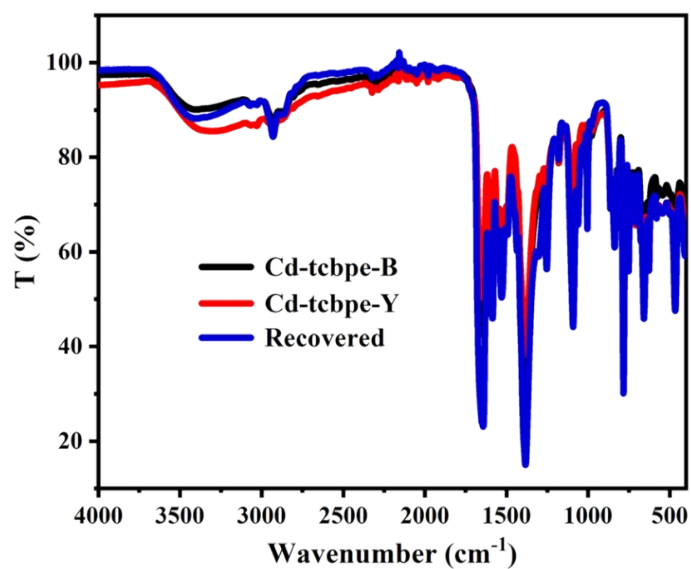

Figure S11 FT-IR spectra of Cd-tcbpe-B, Cd-tcbpe-Y and the recovered sample

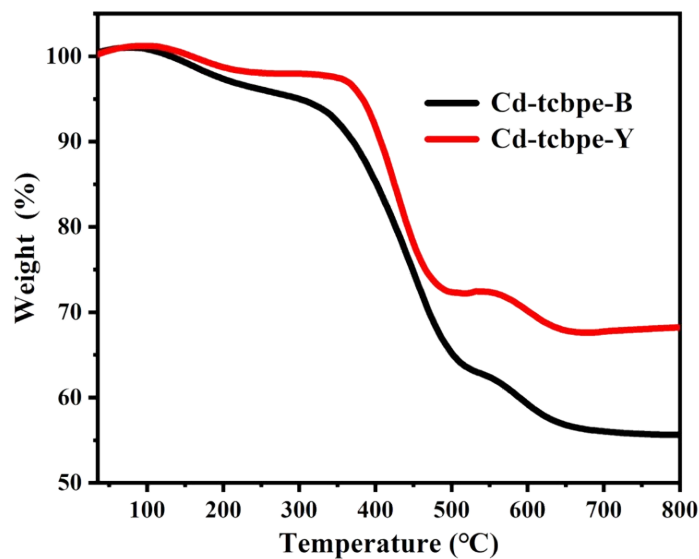

Figure S12 TGA curves of Cd-tcbpe-B and Cd-tcbpe-Y

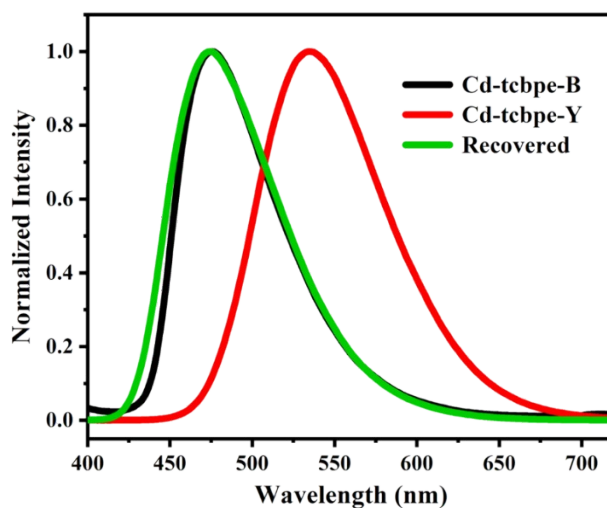

Figure S13 Changes of normalized fluorescence spectra of Cd-tcbpe-B, Cd-tcbpe-Y and the recovered sample

### Preparation of paper-based material of Cd-tcbpe-B

The 40 mg Cd-tcbpe-B complex was spread evenly on the filter paper with adhesive, and it is important to ensure that there are excess complex residues on the surface of the filter paper.



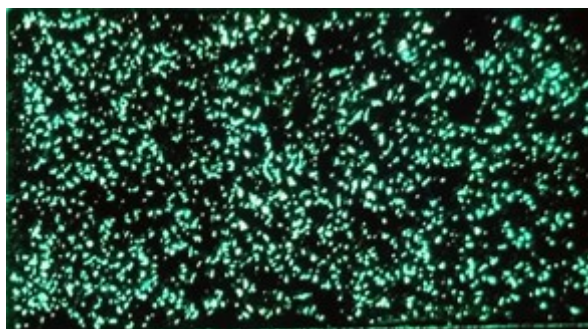

Figure S14 Image of Cd-tcbpe-B which was dispersed in PDMS

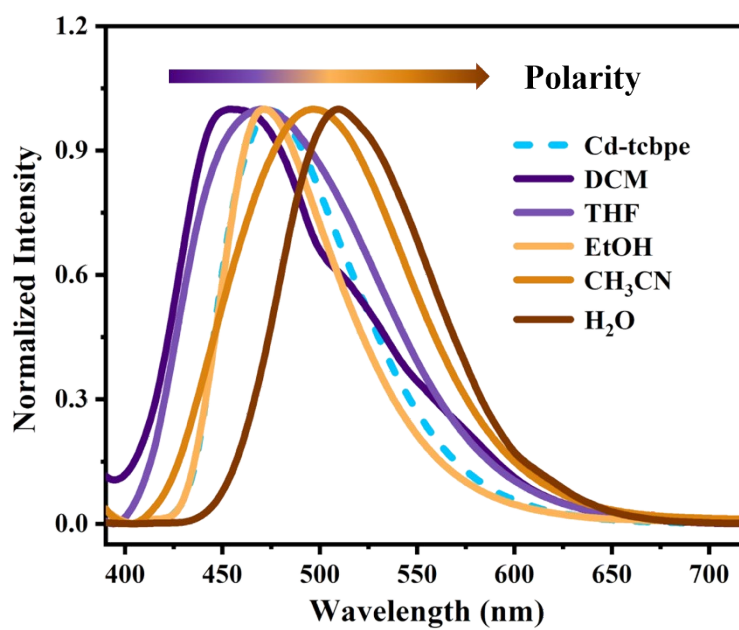

Figure S15 Fluorescence emission spectra of Cd-tcbpe-B with the increase of the polarity of the solvents

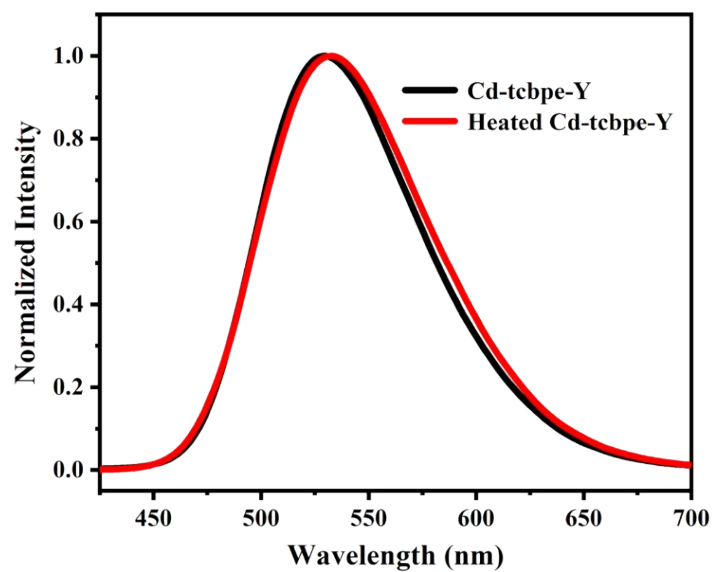

**Figure S16** Fluorescence emission spectra of Cd-tcbpe-Y after being heated at 100 °C

### Hydrochromic luminescence behavior of Cd-tcbpe

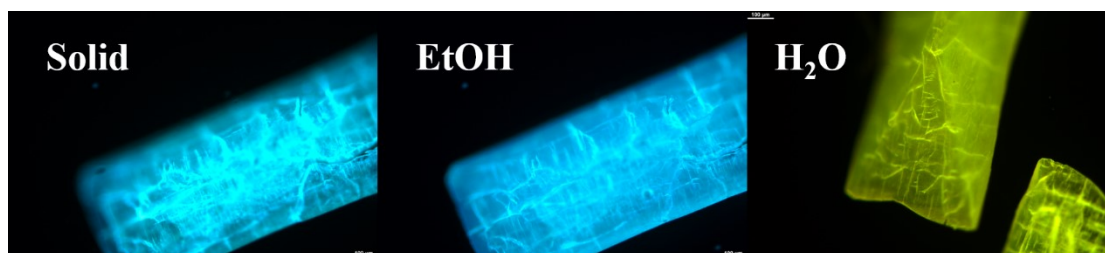

**Figure S17** Fluorescence photographs of Cd-tcbpe-B under different stimulating conditions

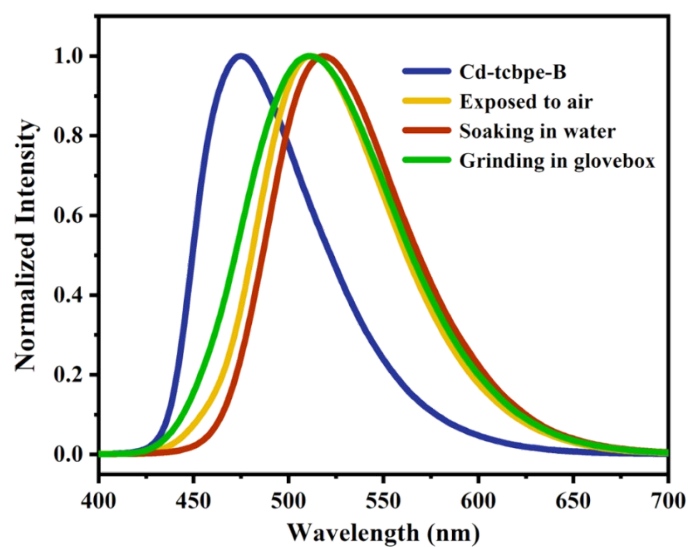

**Figure S18** Fluorescence emission spectra of Cd-tcbpe-B under different stimulating conditions

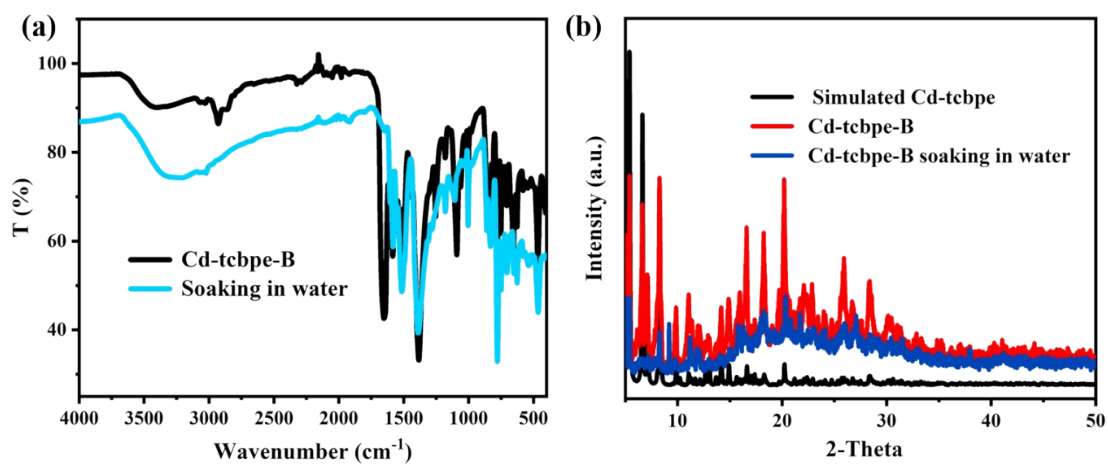

Figure S19 FT-IR spectra and PXRD pattern of Cd-tcbpe-B soaking in water

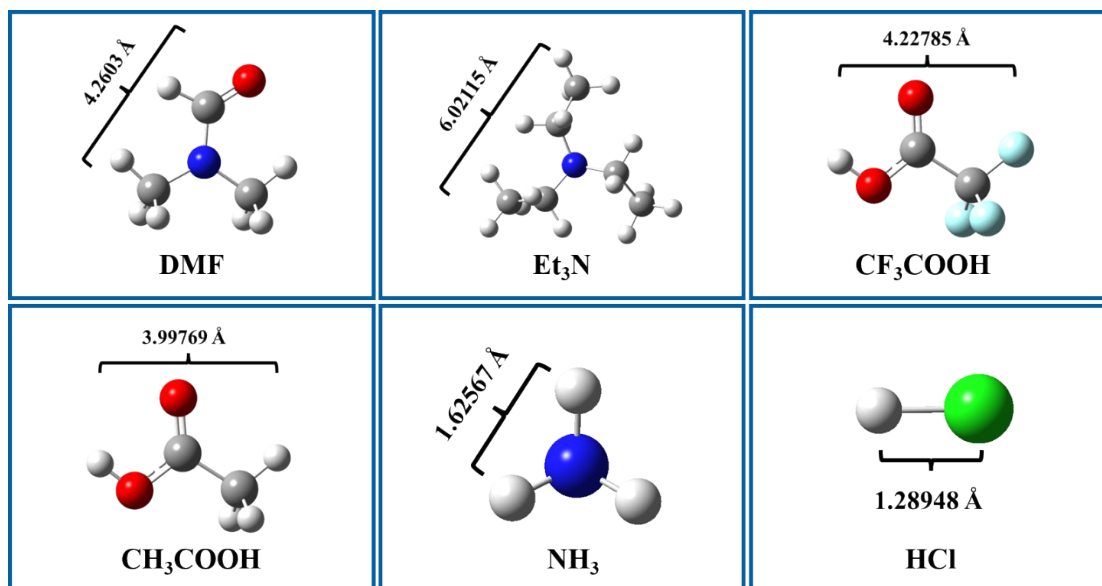

Figure S20 Sizes of six organic small molecules<sup>5</sup>

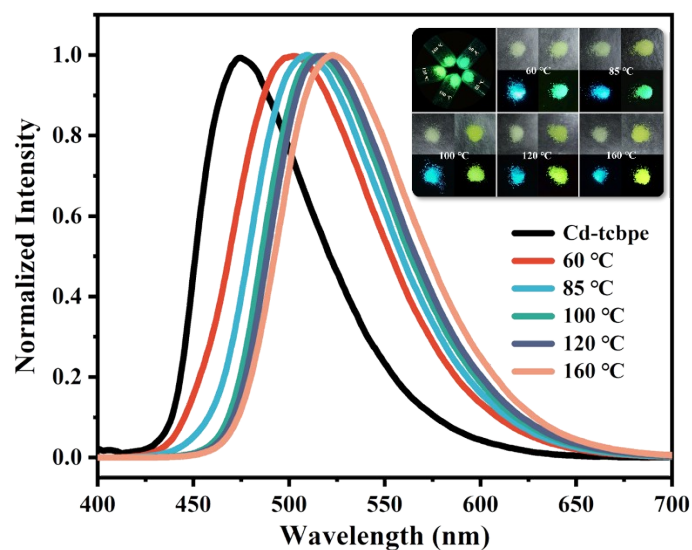

**Figure S21** Fluorescence emission of Cd-tcbpe after heating at different temperatures for 1 hour

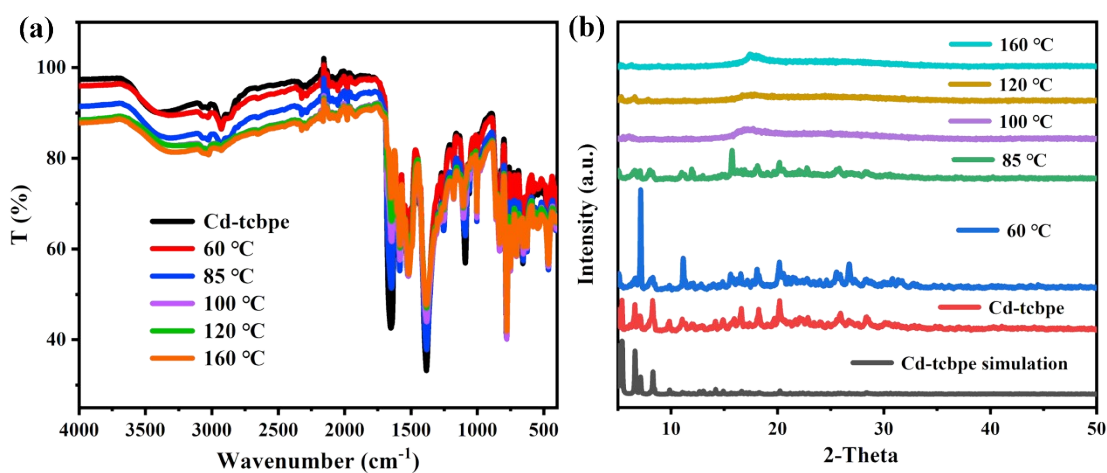

**Figure S22** IR spectra (a) and PXRD patterns (b) of Cd-tcbpe after heating at different temperatures for 1 hour

## Reference

1. Z. Wei, Z.-Y. Gu, R. K. Arvapally, Y.-P. Chen, R. N. McDougald, Jr., J. F. Ivy, A. A. Yakovenko, D. Feng, M. A. Omary and H.-C. Zhou, Rigidifying Fluorescent Linkers by Metal-Organic Framework Formation for Fluorescence Blue Shift and Quantum Yield Enhancement, *J. Am. Chem. Soc.*, 2014, **136**, 8269-8276.
2. G. M. Sheldrick, A short history of SHELX, *Acta Cryst.* 2008, **A64**, 112-122.
3. G. M. Sheldrick, Crystal structure refinement with SHELXL, *Acta Cryst.* 2015, **C71**, 3-8.

4. O.-V. Dolomanov, L.-J. Bourhis, R.-J. Gildea, J. A. K. Howard, and H. Puschmann, OLEX2: a complete structure solution, refinement and analysis program, *J. Appl. Cryst.* 2009, **42**, 339-341.
5. M. J. Frisch, G. W. Trucks, H. B. Schlegel, G. E. Scuseria, M. A. Robb, J. R. Cheeseman, G. Scalmani, V. Barone, B. Mennucci, G. A. Petersson, H. Nakatsuji, M. Caricato, X. Li, H. P. Hratchian, A. F. Izmaylov, J. Bloino, G. Zheng, J. L. Sonnenberg, M. Hada, M. Ehara, K. Toyota, R. Fukuda, J. Hasegawa, M. Ishida, T. Nakajima, Y. Honda, O. Kitao, H. Nakai, T. Vreven, J. A. Montgomery, Jr, J. E. Peralta, F. Ogliaro, M. Bearpark, J. J. Heyd, E. Brothers, K. N. Kudin, V. N. Staroverov, R. Kobayashi, J. Normand, K. Raghavachari, A. Rendell, J. C. Burant, S. S. Iyengar, J. Tomasi, M. Cossi, N. Rega, J. M. Millam, M. Klene, J. E. Knox, J. B. Cross, V. Bakken, C. Adamo, J. Jaramillo, R. Gomperts, R. E. Stratmann, O. Yazyev, A. J. Austin, R. Cammi, C. Pomelli, J. W. Ochterski, R. L. Martin, K. Morokuma, V. G. Zakrzewski, G. A. Voth, P. Salvador, J. J. Dannenberg, S. Dapprich, A. D. Daniels, O. Farkas, J. B. Foresman, J. V. Ortiz, J. Cioslowski, D. J. Fox, Gaussian, Inc., Wallingford CT, 2009.
